# Supplementary material for: Electrochemistry of chloramphenicol on laser-induced graphene electrodes and its voltammetric determination in honey
Source: Royal Society of Chemistry journal article supplement (doi:10.1039/d4ay01237b), 2024-01-01
Supplement: d4ay01237b1.pdf [file d4ay01237b1.pdf]

## **Electrochemistry of chloramphenicol on laser-induced graphene electrodes and its voltammetric determination in honey**

Nélio Inácio Gravata Inoque<sup>a</sup> and Rodrigo Alejandro Abarza Muñoz<sup>a\*</sup>

<sup>a</sup> Institute of Chemistry, Federal University of Uberlândia, 38400-902, Uberlândia, Minas Gerais, Brazil

**\*Corresponding author:** munoz@ufu.br

Number of pages: 8

Number of figures: 10

Number of tables: 1

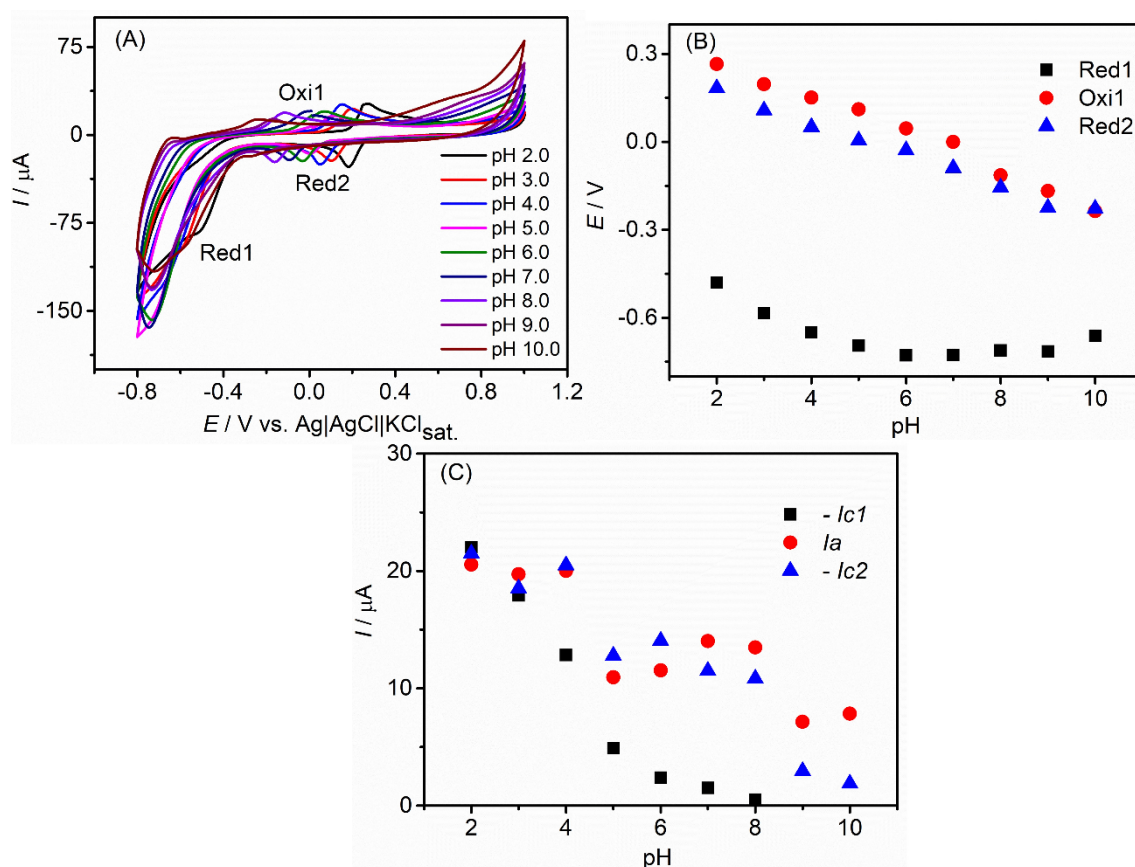

**Figure S1.** (A) Cyclic voltammetric recordings for CAP (0.5 mmol L<sup>-1</sup>) in 0.12 mol L<sup>-1</sup> BR buffer solution (pH range from 2.0 to 10.0). (B) pH influence at peak potential ( $E_p$ ) and (C) pH influence at peak current ( $I_p$ ). Conditions: step potential, 5 mV scan rate, 50 mV s<sup>-1</sup>.

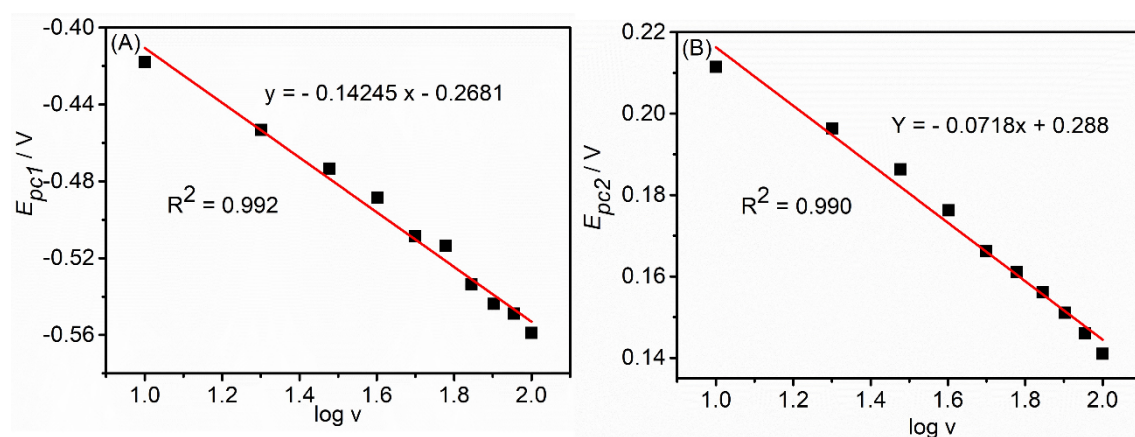

**Figure S2.** (A and B) Relationship between peak potential ( $E_p$ ) and  $\log v$ .

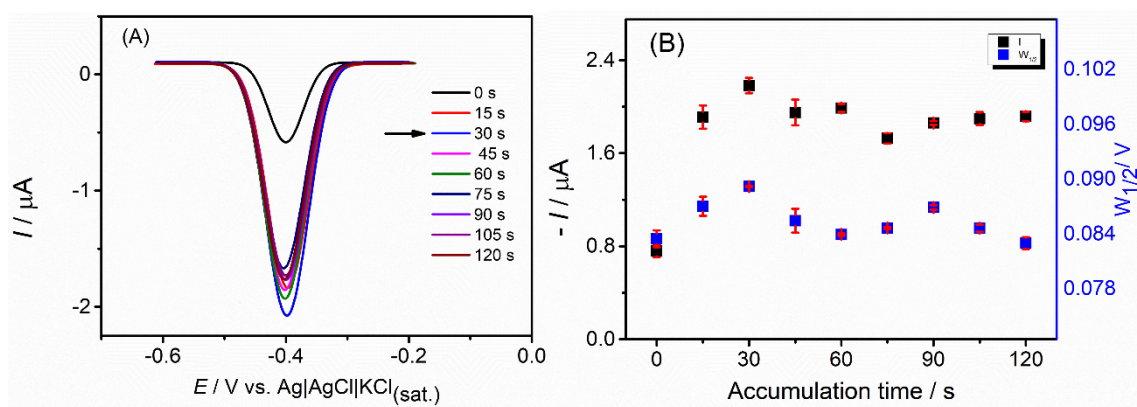

**Figure S3.** (A) Baseline-corrected DPV responses recorded for 50  $\mu\text{mol L}^{-1}$  of CAP in 0.12 mol  $\text{L}^{-1}$  BR buffer as function of accumulation time. (B) Peak currents (black squares) and peak width half height (blue squares) as function of accumulation time. Conditions: Step potential, 5 mV; modulation amplitude, 60 mV; modulation time, 50 ms; interval time, 0.5 s.

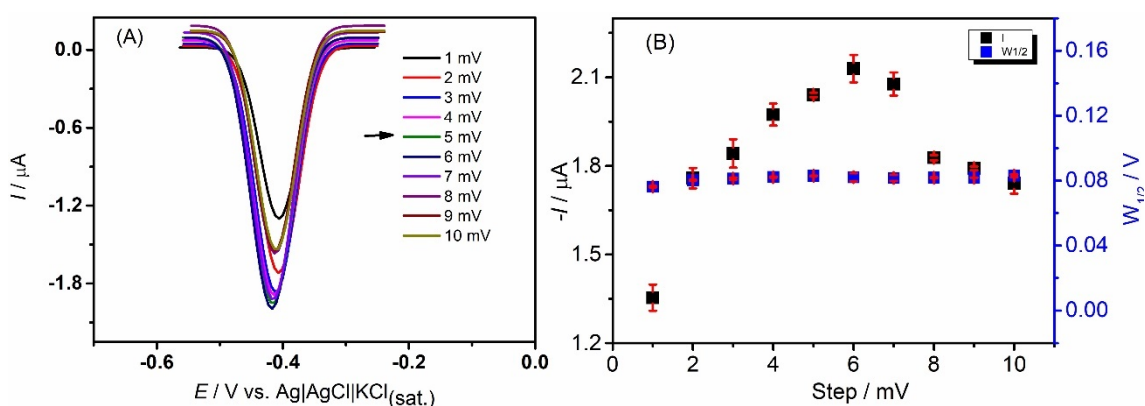

**Figure S4.** (A) Baseline-corrected DPV voltammograms obtained for 50  $\mu\text{mol L}^{-1}$  of CAP in 0.12 mol  $\text{L}^{-1}$  BR buffer as function of step potential. (B) Peak currents (black squares) and peak width half height (blue squares) as function of step potential. Conditions: accumulation time, 30 s; modulation amplitude, 60 mV; modulation time, 50 ms and interval time, 0.5 s.

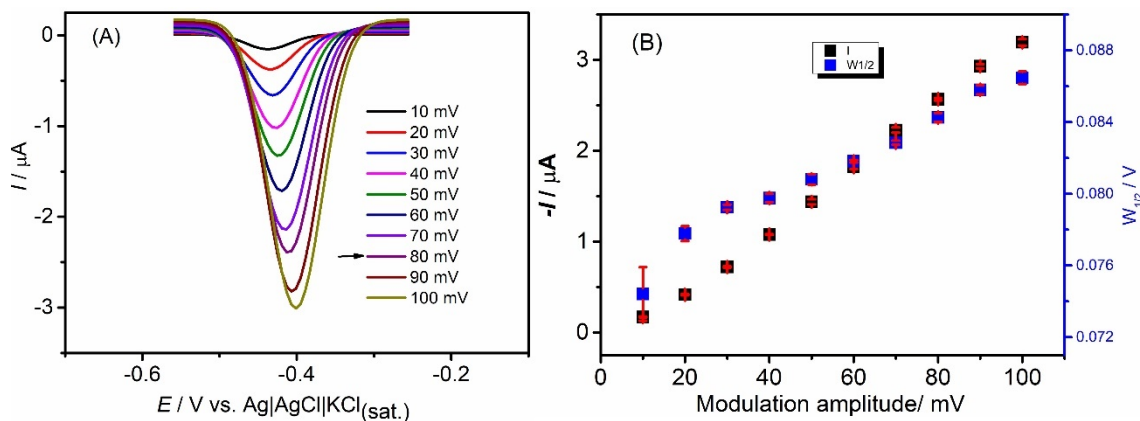

**Figure S5.** (A) Baseline- corrected DPV responses recorded for 50  $\mu\text{mol L}^{-1}$  of CAP in 0.12 mol  $\text{L}^{-1}$  BR buffer as function of modulation amplitude. (B) Peak currents (black squares) and peak width half height (blue squares) as function of modulation amplitude. Conditions: accumulation time, 30 s; step potential, 5 mV; modulation time, 50 ms s and interval time, 0.5 s.

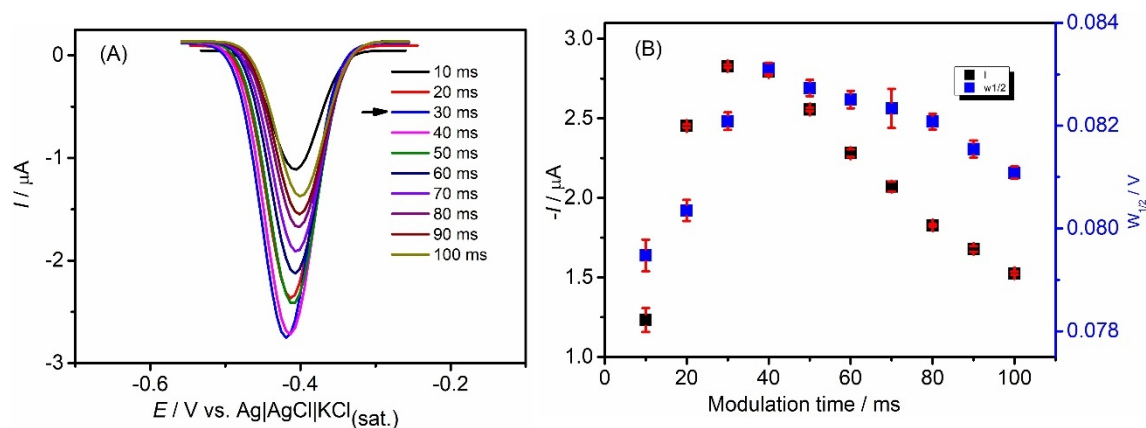

**Figure S6.** (A) DPV (corrected baseline) measures for 50  $\mu\text{mol L}^{-1}$  of CAP in 0.12 mol  $\text{L}^{-1}$  BR buffer as function of modulation time. (B) Peak currents (black squares) and peak width half height (blue squares) as function of modulation time. Conditions: accumulation time, 30 s; step potential, 5 mV; modulation amplitude, 80 mV s and interval time, 0.5 s.

**Table S1.**

Selection of the DPV parameters for the determination of CAP.

| Parameters             | Studied interval      | Selected condition/value |
|------------------------|-----------------------|--------------------------|
| Supporting electrolyte | BR buffer (pH 2.0-10) | BR (pH 2.0)              |
| Step potential         | 1–10 mV               | 5 mV                     |
| Modulation amplitude   | 10 – 100 mV           | 80 mV                    |
| Modulation time        | 10-100 ms             | 30 ms                    |
| Accumulation time      | 0 – 120 s             | 30 s                     |

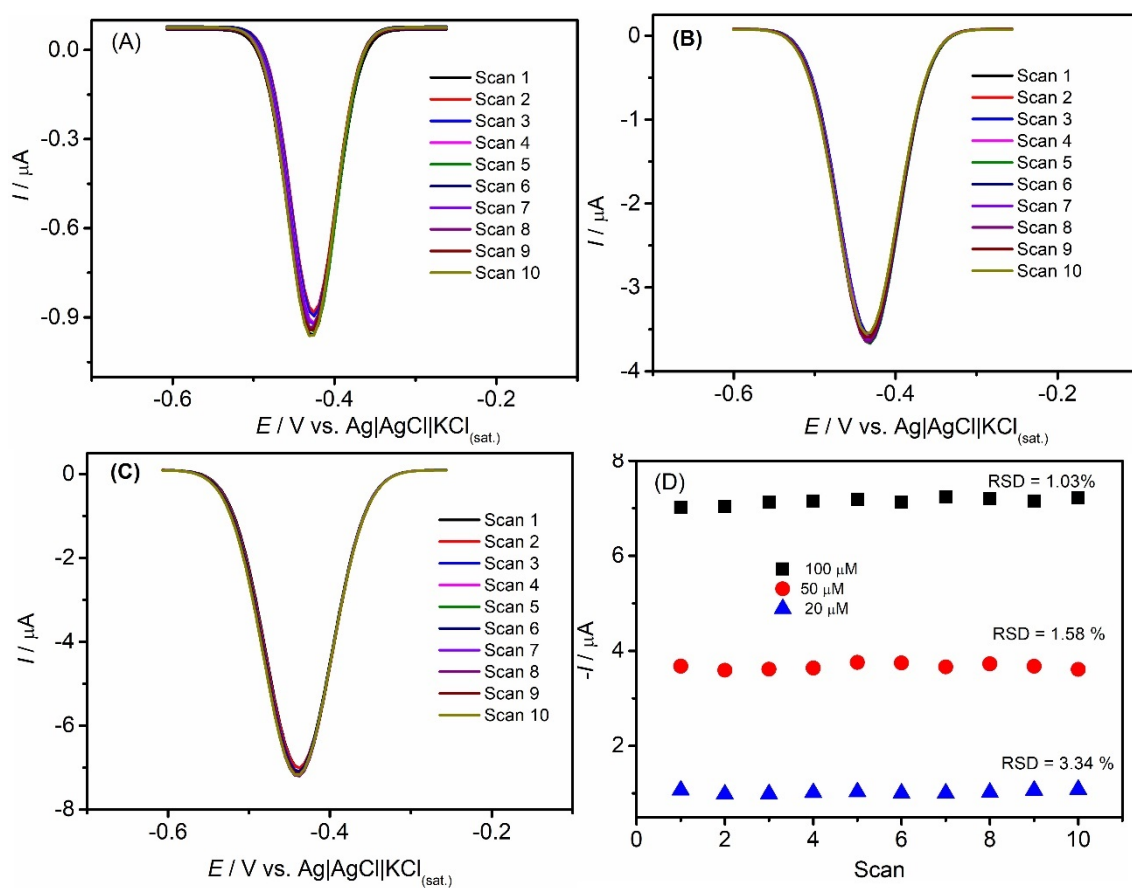

**Figure S7.** Repeatability data obtained from successive scan (n = 10) for CAP solution containing: (A) 20; (B) 50 and (C) 100  $\mu\text{mol L}^{-1}$ . Conditions: Table S1.

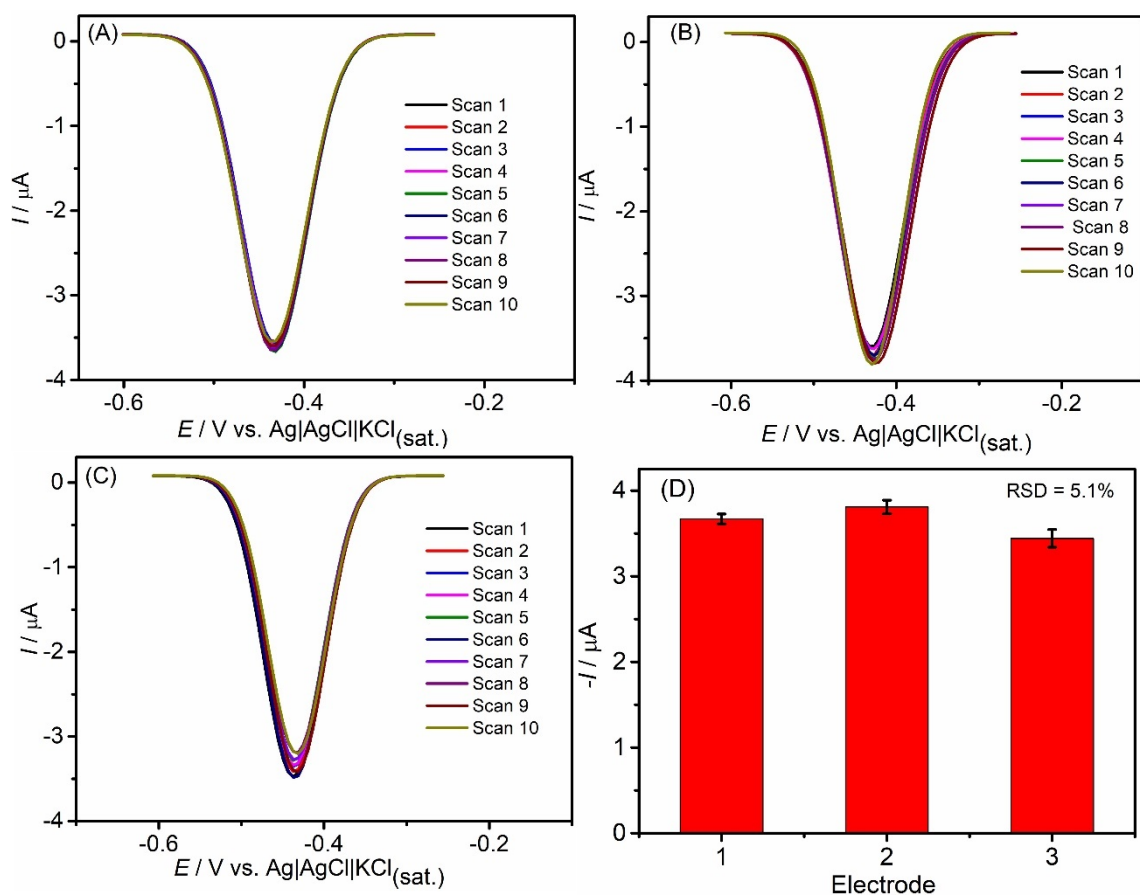

**Figure S8.** Reproducibility data obtained from successive scan ( $n = 10$ ) for CAP solution containing 50  $\mu\text{mol L}^{-1}$  at three different electrodes. Conditions: table S1.

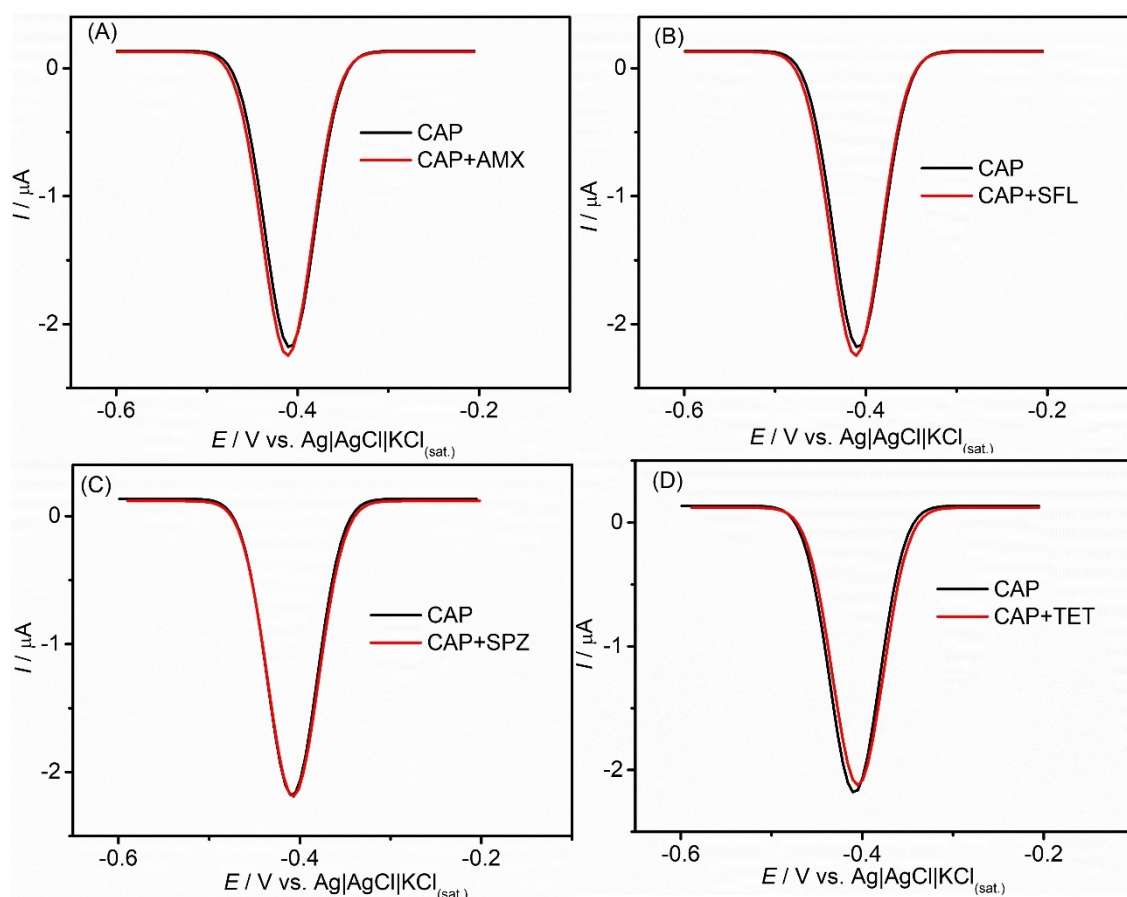

**Figure S9.** Baseline-corrected DPV voltammograms obtained for CAP  $50 \mu\text{mol L}^{-1}$  and the equimolar mixture ( $50 \mu\text{mol L}^{-1}$ ) of CAP and interferents (A) AMX; (B) SFL; (C) SFZ and (D) TET under optimized instrumental conditions.

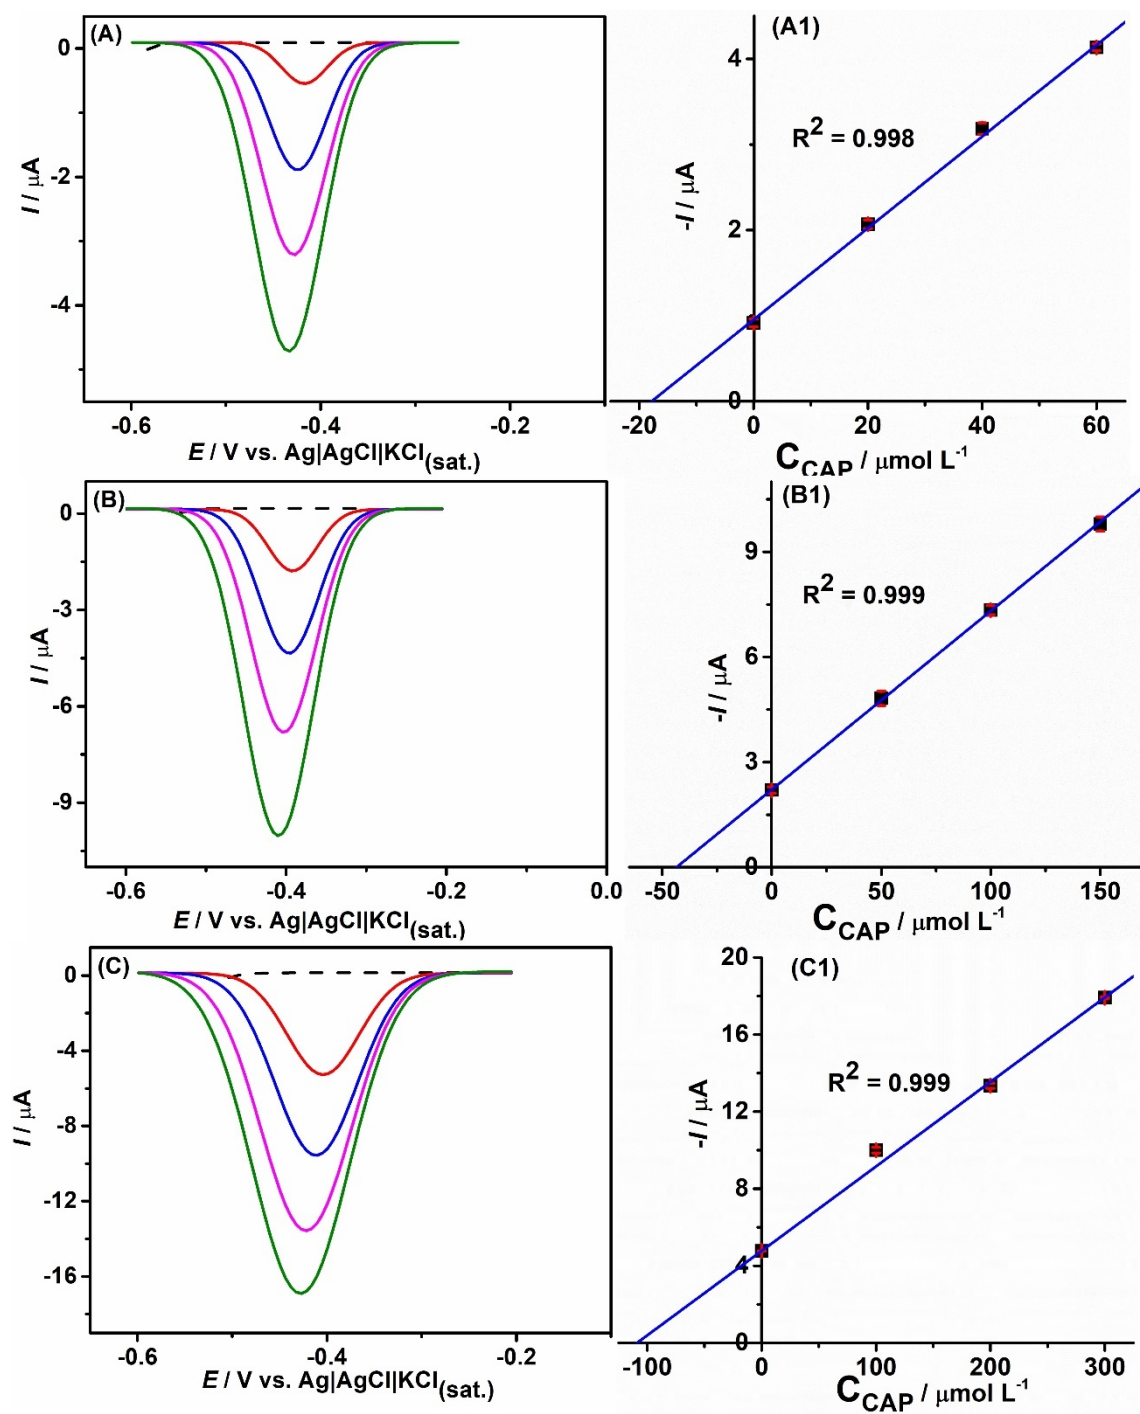

**Figure S10.** Baseline-corrected DPV responses obtained ( $n = 3$ ) for CAP detection in honey sample spiked with a standard solution resulting (A), (B) and (C) in the final concentration in the cell of 20 (A), 50 (B) and 100 (C)  $\mu\text{mol L}^{-1}$  followed by three additions of standard solutions. Respective calibration curves are presented beside each DPV scans. In all plots the 1<sup>st</sup> scan shows blanks; 2<sup>nd</sup> scan corresponds to sample; 3<sup>rd</sup>, 4<sup>th</sup> and 5<sup>th</sup> scans show the addition of standard solution of CAP. Optimized conditions in Table S1.
